# Supplementary material for: TP53 Mutational Status Is a Potential Marker for Risk Stratification in Wilms Tumour with Diffuse Anaplasia
Source: PubMed Central journal article supplement (PMC4196953; doi:10.1371/journal.pone.0109924), 2014-10-14
Supplement: pone.0109924.s001.pdf [file pone.0109924.s001.pdf]

### Diffuse anaplastic cases (n=40)

---

|                                  |           |
|----------------------------------|-----------|
| <b>Age at diagnosis (median)</b> | 4.6 years |
| <b>Sex (M:F)</b>                 | 1:3       |
| <b>Stage I</b>                   | 11        |
| <b>II</b>                        | 8         |
| <b>III</b>                       | 16        |
| <b>IV</b>                        | 5         |
| <b>Immediate nephrectomy</b>     | 32        |
| <b>Preoperative chemotherapy</b> | 8         |
| <b>Relapsed</b>                  | 17        |
| <b>Died</b>                      | 15        |
| <b><i>TP53</i> mutations</b>     | 25 (63%)  |

---
